# Supplementary material for: Cobaltabis(dicarbollide) ([o-COSAN]−) as Multifunctional Chemotherapeutics: A Prospective Application in Boron Neutron Capture Therapy (BNCT) for Glioblastoma
Source: MDPI journal article supplement (doi:10.3390/cancers13246367), 2021-12-19
Supplement: s1 [file s1]

# Supplementary Materials: Cobaltabis(dicarbollide) ([*o*-CO-SAN]-) as Multifunctional Chemotherapeutics: A Prospective Application in Boron Neutron Capture Therapy (BNCT) for Glioblastoma

Miquel Nuez-Martinez, Catarina I. G. Pinto, Joana F. Guerreiro, Filipa Mendes, Fernanda Marques, Amanda Muñoz-Juan, Jewel Ann Maria Xavier, Anna Laromaine, Valeria Bitonto, Nicoletta Protti, Simonetta Geninatti Crich, Francesc Teixidor and Clara Viñas

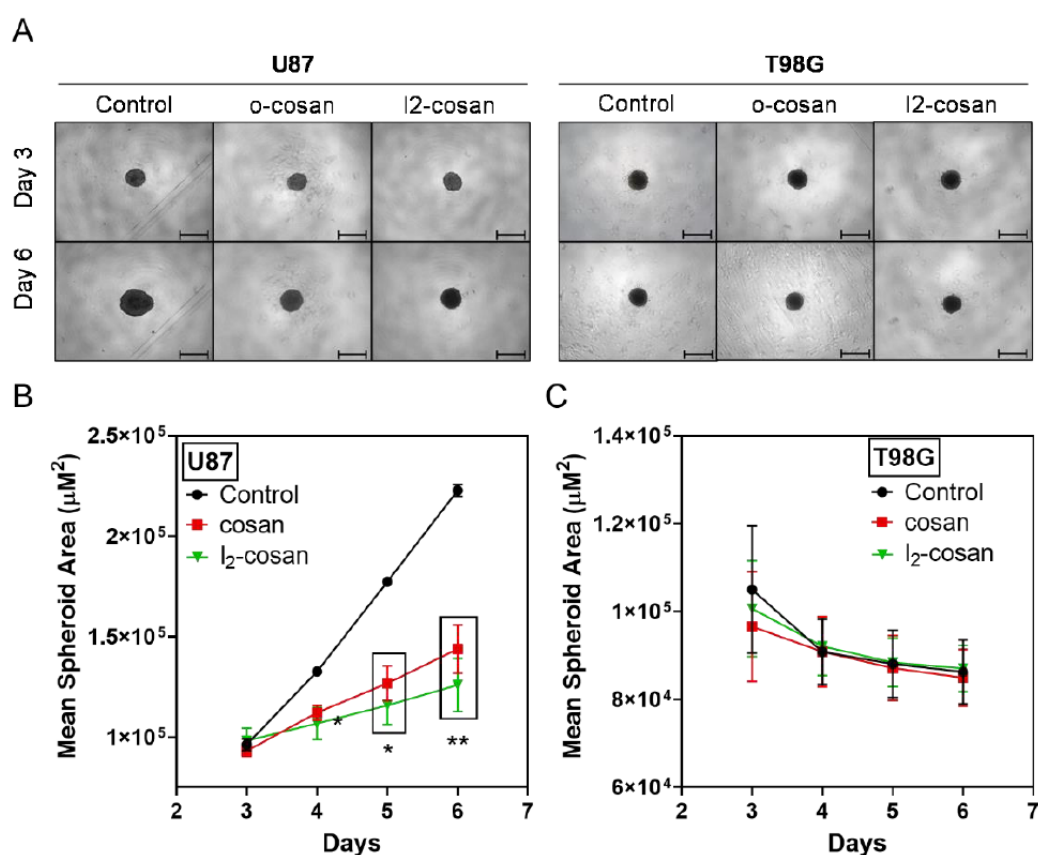

**Figure S1.** Effect of exposure to concentrations above the IC<sub>50</sub> (determined by the MTT assay) of [*o*-COSAN]- and [8,8'-*o*-I<sub>2</sub>-COSAN]- on U87 and T98G spheroids. **(A)** Representative images of the spheroids before (day 3 of culture) and after 72 h (day 6 of culture) of incubation with the different complexes; **(B)** U87 and **(C)** T98G spheroids growth, represented by the mean spheroids area (in  $\mu\text{M}^2$ ) as a function of the number of days in culture. Controls consist of spheroids incubated only with medium. Data are presented as the average  $\pm$  SD of 3 independent assays for spheroids. Scale bars correspond to 500  $\mu\text{m}$ . Statistical significance was calculated using one-way ANOVA, followed by Dunnett's test comparing treated spheroids/cells with control spheroids/cells (\*  $p \leq 0.05$ , \*\*  $p \leq 0.01$ ).

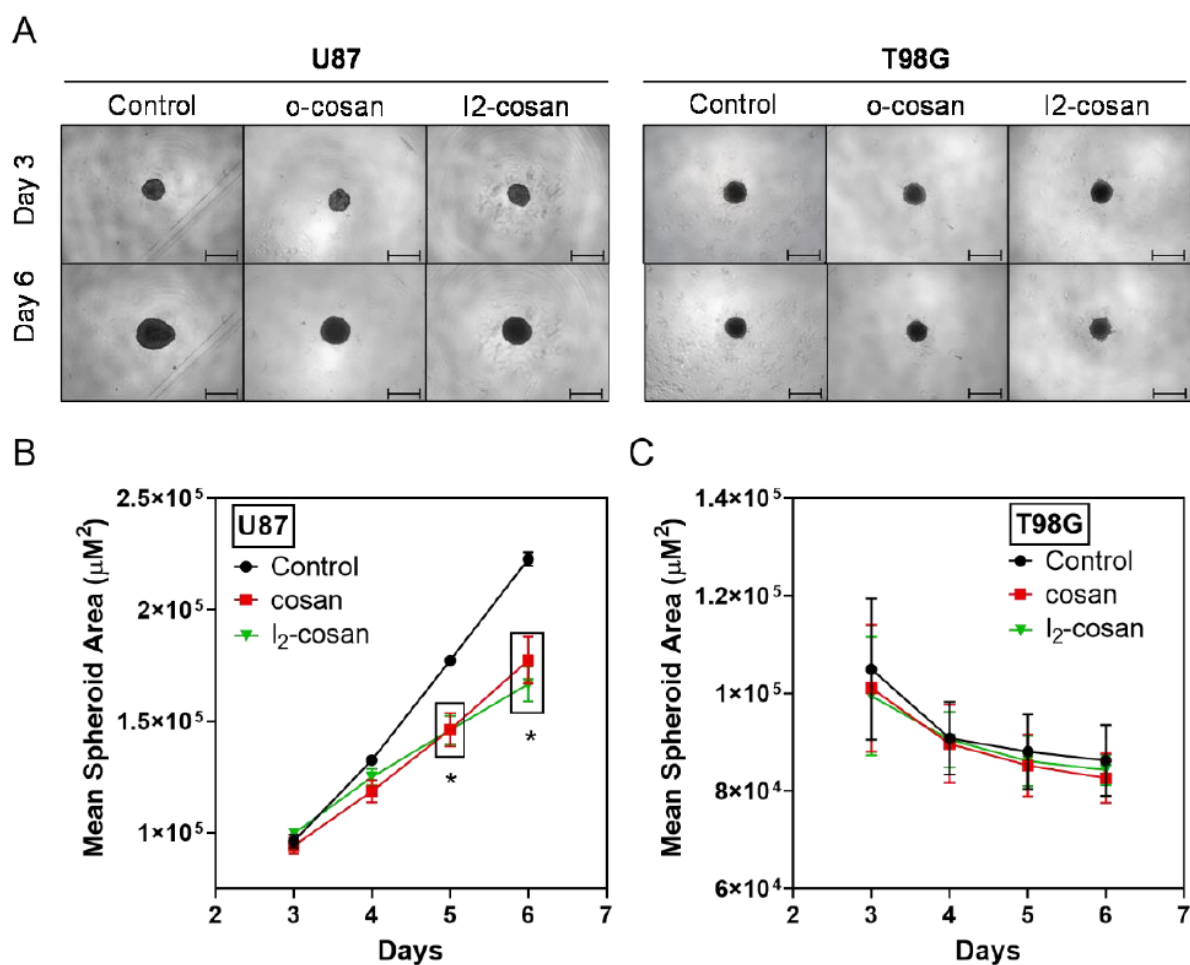

**Figure S2.** Effect of exposure to concentrations below the IC<sub>50</sub> (determined by the MTT assay) of [*o*-COSAN]- and [8,8'-*o*-*l*<sub>2</sub>-COSAN]- on U87 and T98G spheroids. **(A)** Representative images of the spheroids before (day 3 of culture) and after 72 h (day 6 of culture) of incubation with the different complexes; **(B)** U87 and **(C)** T98G spheroids growth, represented by the mean spheroids area (in  $\mu\text{M}^2$ ) as a function of the number of days in culture. Controls consist of spheroids incubated only with medium. Data are presented as the average  $\pm$  SD of 3 independent assays for spheroids. Scale bars correspond to 500  $\mu\text{m}$ . Statistical significance was calculated using one-way ANOVA, followed by Dunnett's test comparing treated spheroids/cells with control spheroids/cells (\*  $p \leq 0.05$ ).

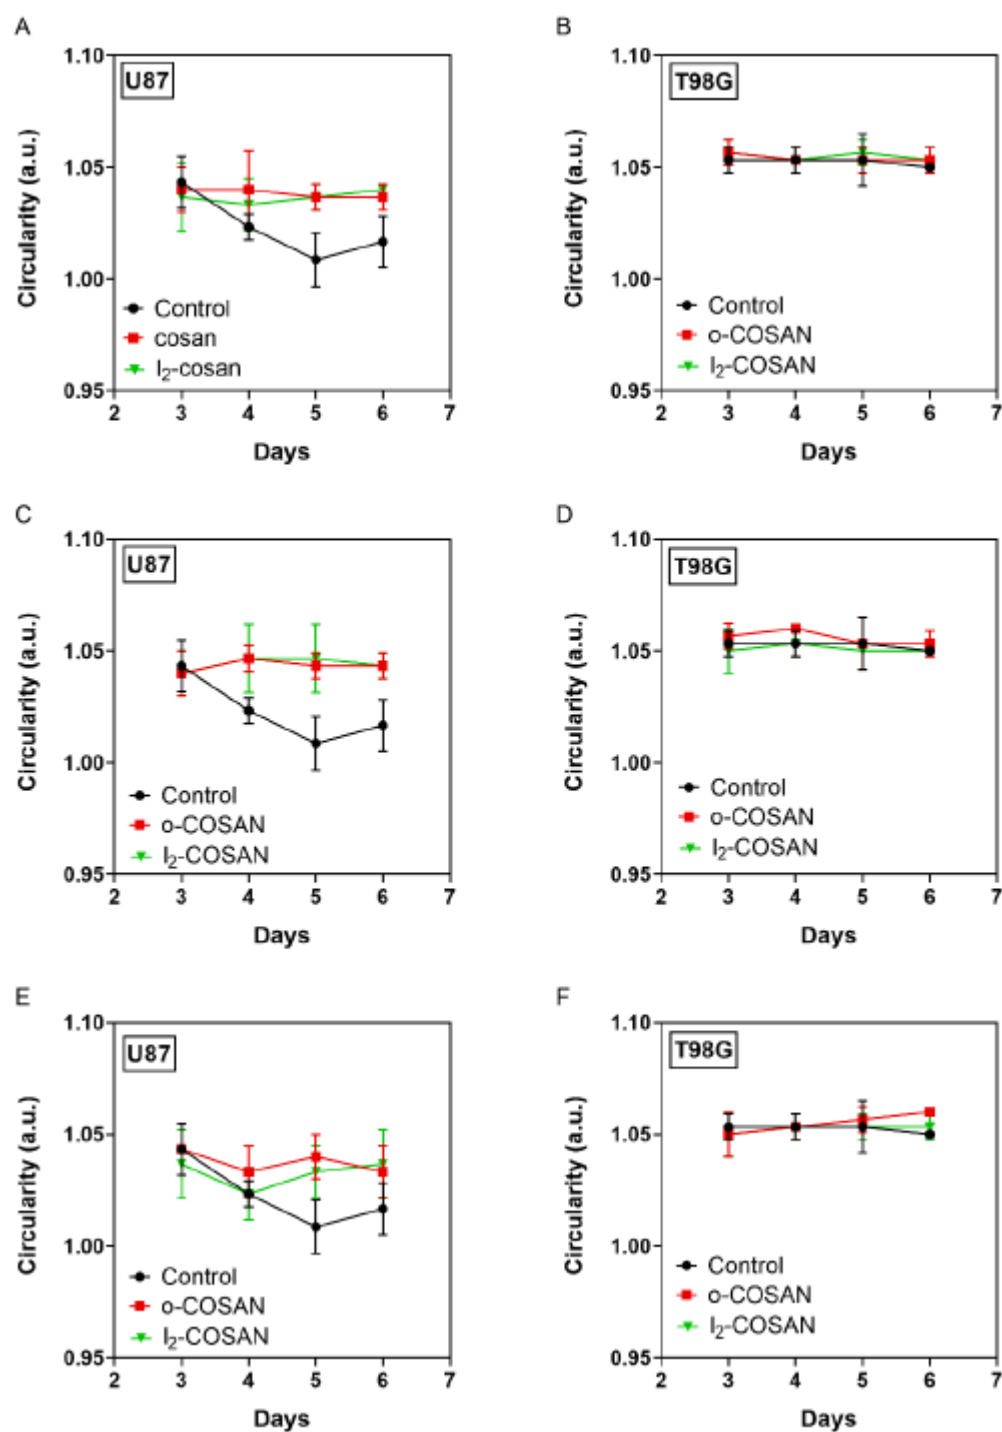

**Figure S3.** Effects of incubation of [o-COSAN]- and [8,8'-I<sub>2</sub>-o-COSAN]- on U87 (left panels) and T98G (right panels) spheroids' circularity. Effects of exposure to (A,B) 50. concentrations, (C,D) above IC<sub>50</sub> concentrations, and (E,F) below IC<sub>50</sub> concentrations on spheroids circularity, represented by the mean spheroids' circularity (in arbitrary units) as a function of the number of days in culture. Controls consist of spheroids incubated only with medium. Data are presented as the average  $\pm$  SD of 3 independent assays for spheroids. Statistical significance was calculated using one-way ANOVA, followed by Dunnett's test comparing treated spheroids/cells with control spheroids/cells.

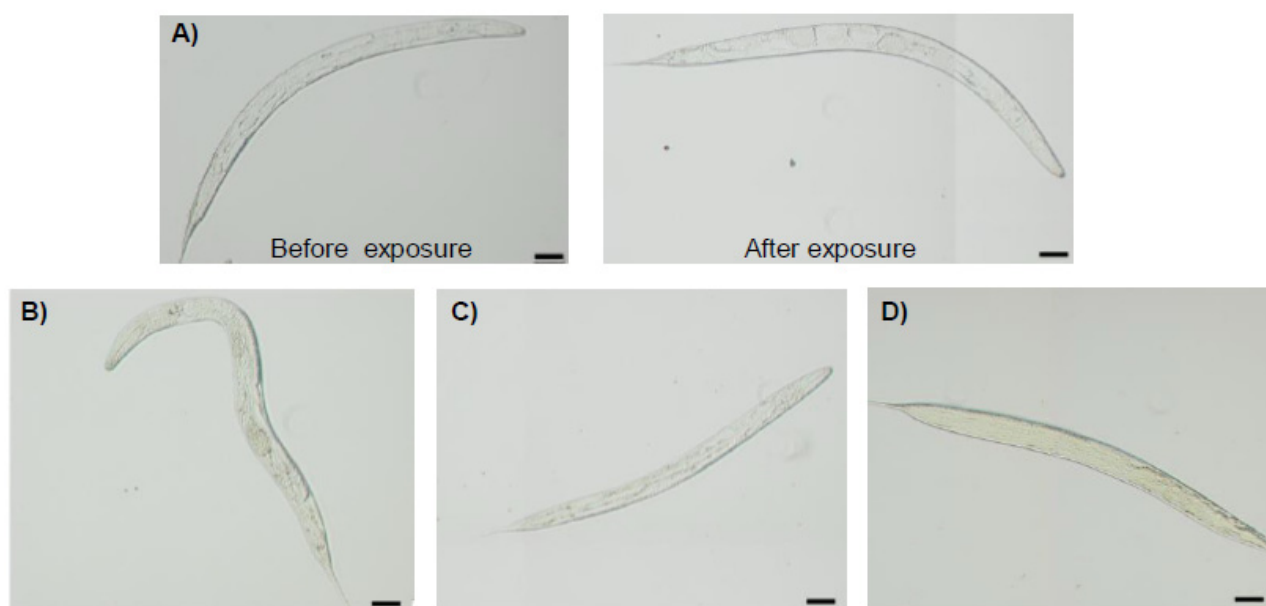

**Figure S4.** Optical microscopy images of L4 *C. elegans* L4 after 24h of incubation with different concentration of Na[o-COSAN]. (A) Control worms grow from L4 stage to the adult stage. (B) Worms incubated with 1  $\mu$ M [o-COSAN]- can develop till the adult stage. (C) At 10  $\mu$ M [o-COSAN]- a high percentage of worms are dead in the L4 stage. (D) At 200  $\mu$ M [o-COSAN]- worms are dead in the L4 stage with a yellowish color. Scale bar 50  $\mu$ m.

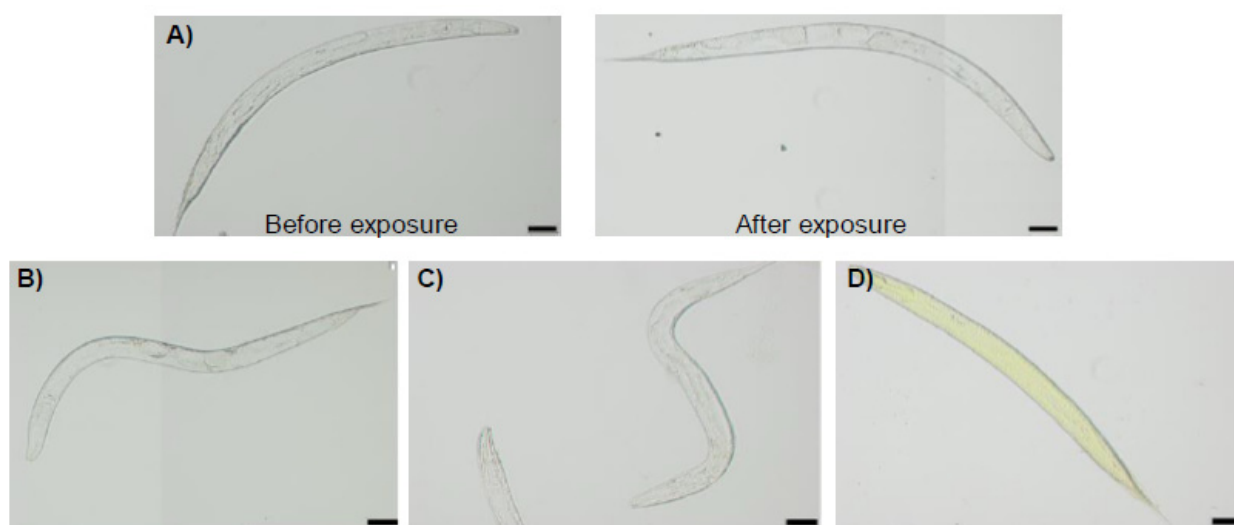

**Figure S5.** Optical microscopy images of L4 *C. elegans* after 24 h of incubation with different concentraTable 8. I2-o-COSAN]-. (A) Control worms grow from L4 stage to the adult stage. (B) Worms incubated with 1  $\mu$ M [8,8'-I2-o-COSAN]- can develop till the adult stage. (C) At 10  $\mu$ M [8,8'-I2-o-COSAN] a high percentage of worms are dead in the L4 stage. (D) At 200  $\mu$ M [8,8'-I2-o-COSAN]- worms are dead in the L4 stage with a yellowish color. Scale bar 50  $\mu$ m.

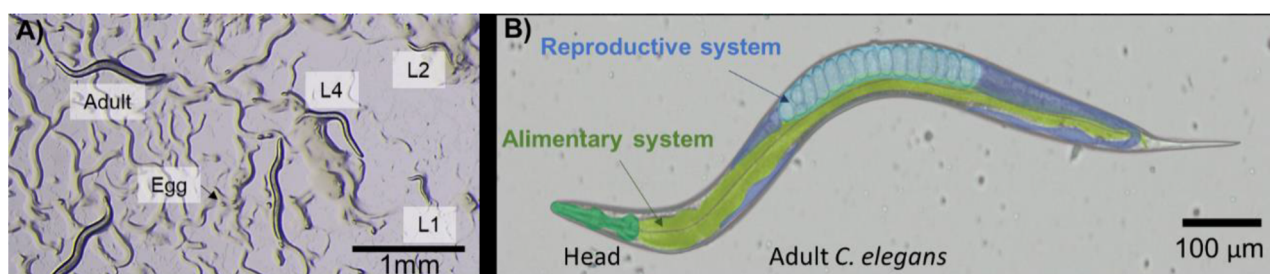

**Scheme 1.** *C. elegans* maintenance and structure. (A) Unsynchronized population of *C. elegans* in NGM plates where different stages are labelled. (B) Anatomical image of an adult *C. elegans*.

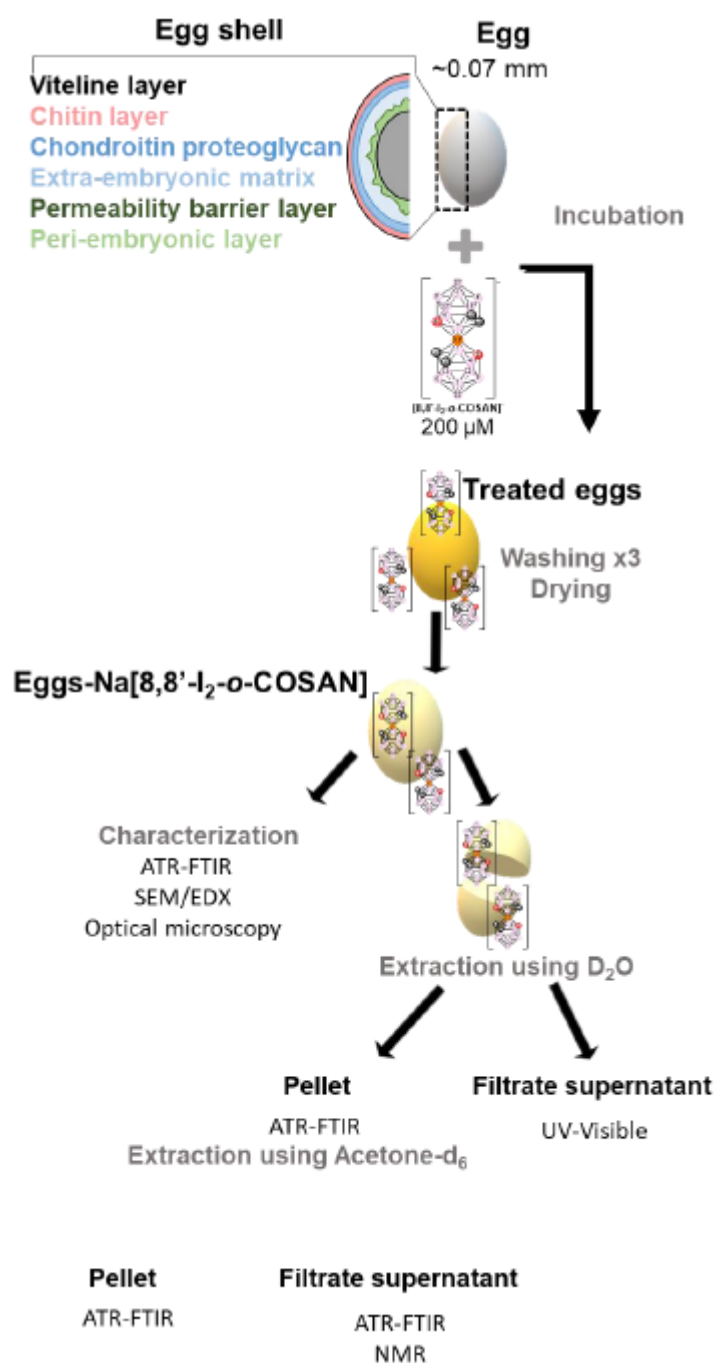

**Scheme 2.** Designed procedure for the study of formed new hybrids eggs/[8,8'-I<sub>2</sub>-o-COSAN]-.

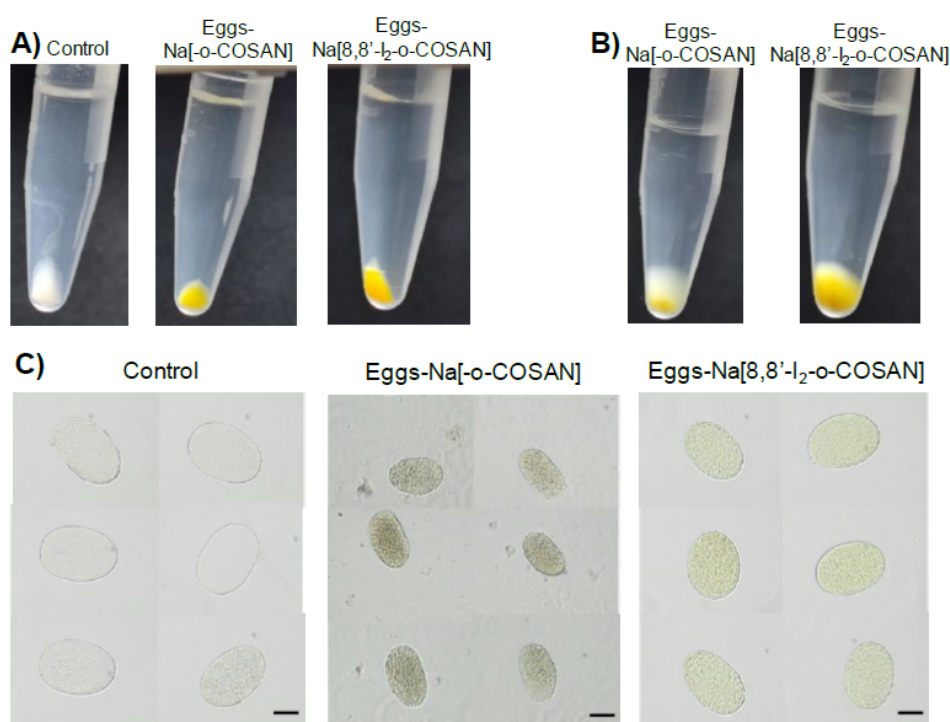

**Figure S6.** *C. elegans*' embryos treatment with cobaltabis(dicarbollides). (A) Photography of the *C. elegans* embryos samples after treatment for 24 hours at room temperature with 0 (control) and 200  $\mu$ M of Na[o-COSAN] and Na[8,8'-I<sub>2</sub>-o-COSAN]. (B) Photography of treated *C. elegans* embryos samples after cleaning three times with MQ water to remove the excess. (C) Their optical microscopy images. Scale bar: 20  $\mu$ m.

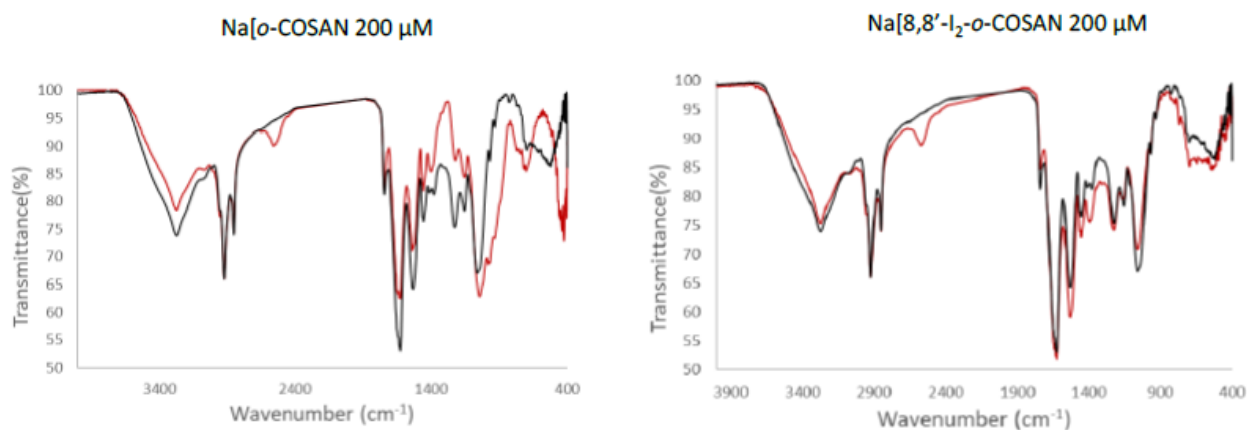

**Figure S7.** ATR-IR spectra of the *C. elegans* embryos samples after treatment for 24 hours at room temperature with 0 (control) and 200  $\mu$ M of Na[o-COSAN] and Na[8,8'-I<sub>2</sub>-o-COSAN], washing ( $\times 3$ ), centrifugated and dried at 60  $^{\circ}$ C for 17 hours. In black *C. elegans* embryos and in red *C. elegans* embryos after treatment with 200  $\mu$ M of cobaltabis(dicarbollide).

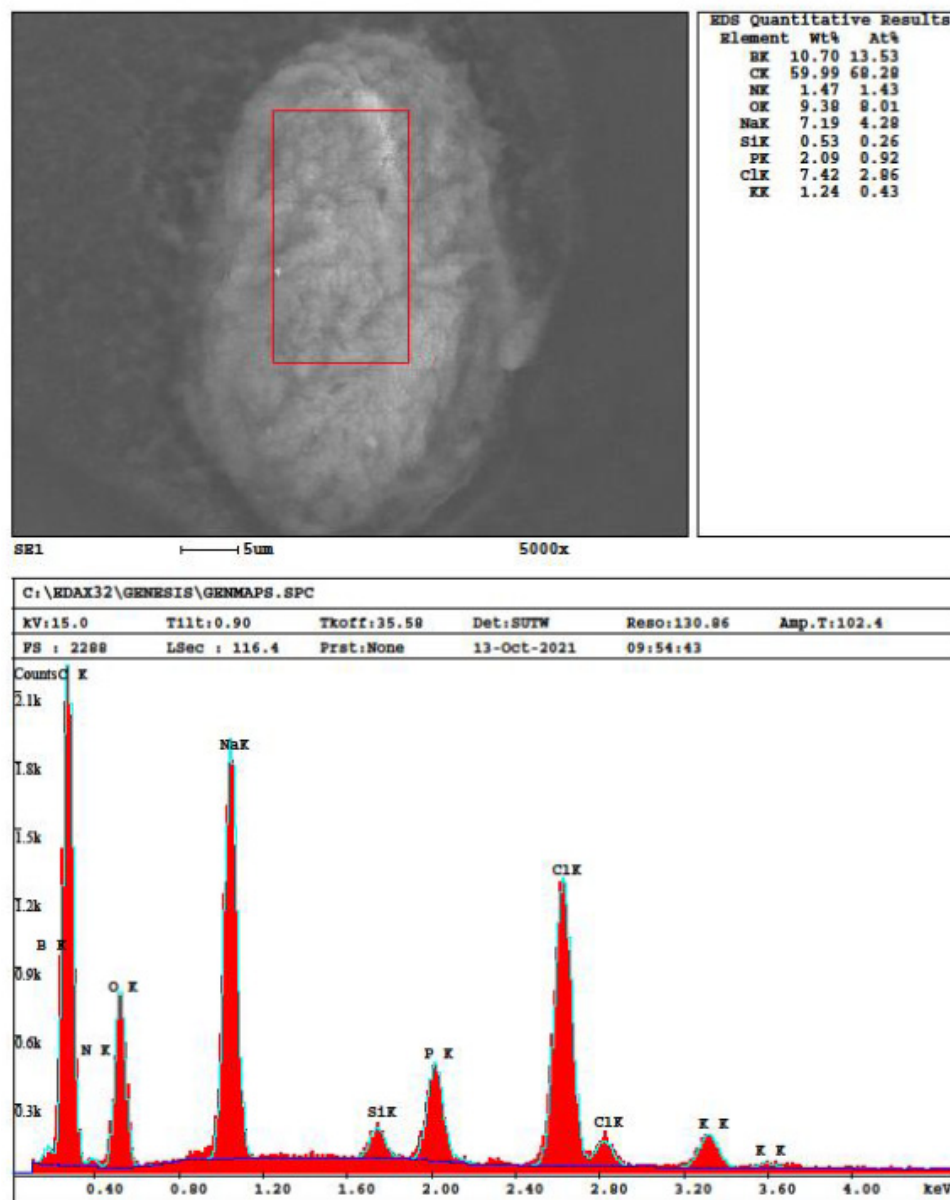Figure S8. SEM/EDX of *C. Elegans* embryos control.



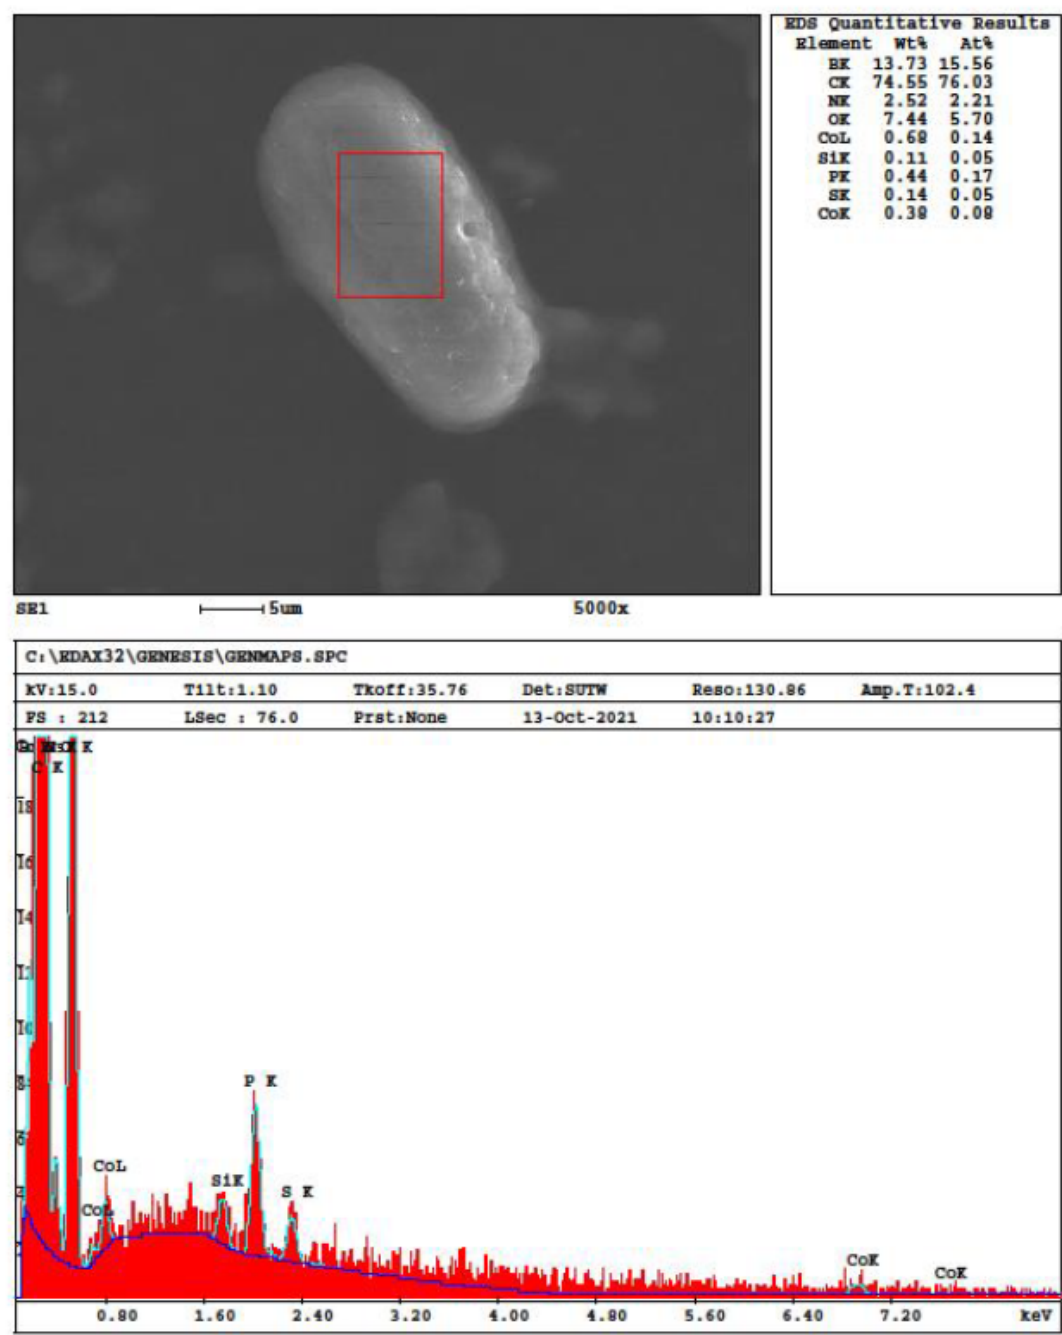

**Figure S9.** SEM/EDX of *C. Elegans* embryos after treatment with 200 M of Na[o- COSAN] for 24 h at room temperature under gently agitation.



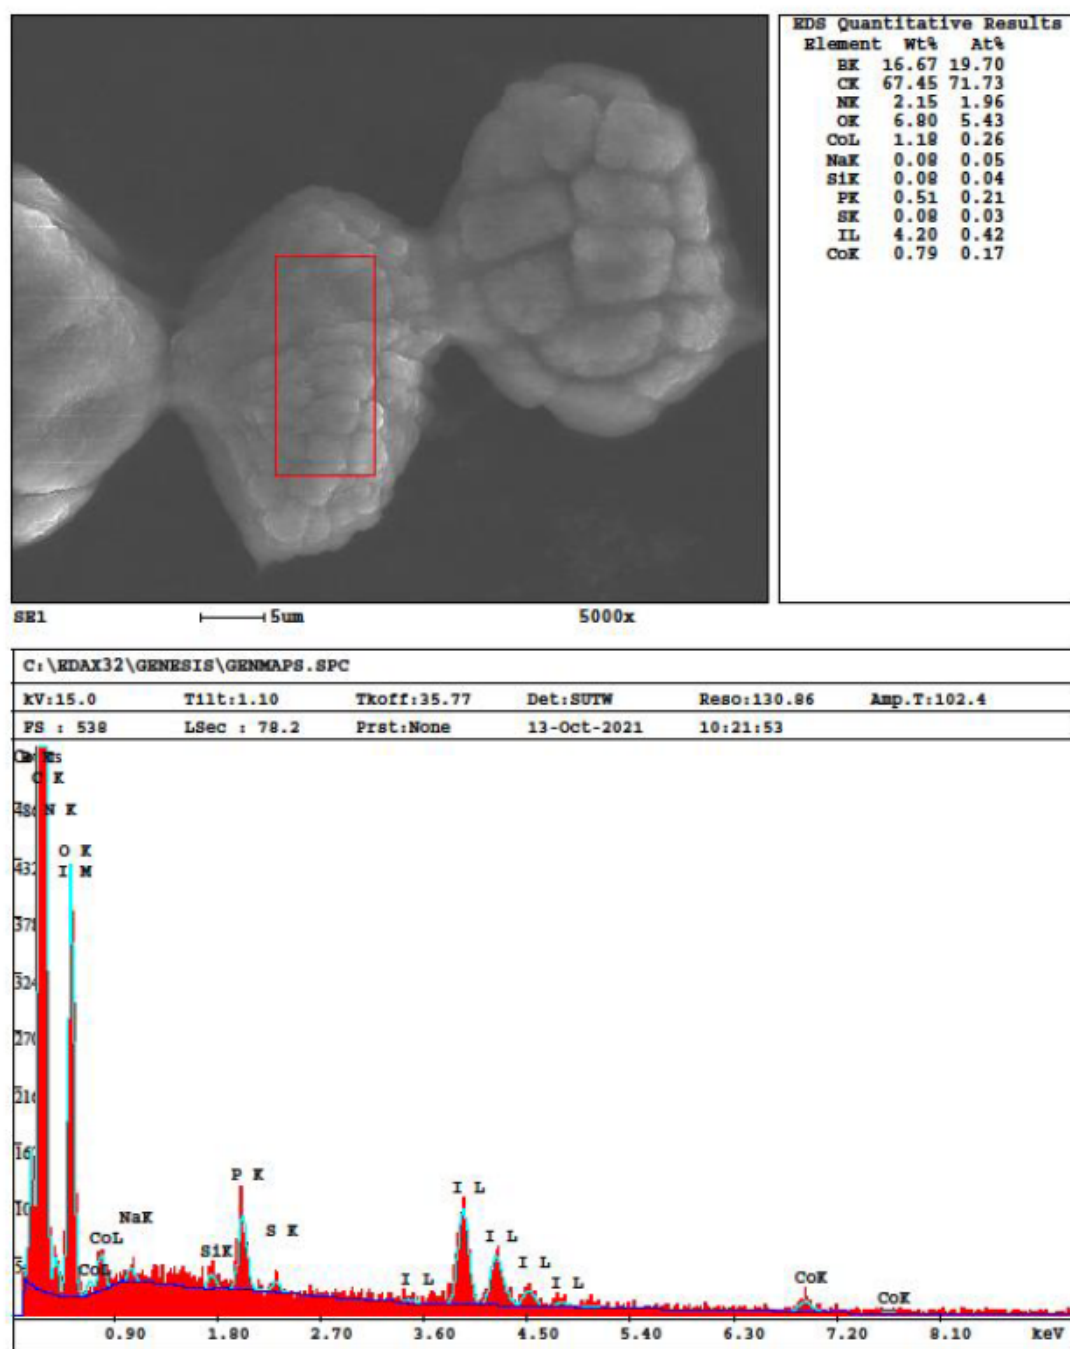

**Figure S10.** SEM/EDX of *C. Elegans* embryos after treatment with 200  $\mu$ M of Na[8,8'-I2-o-COSAN] for 24 h at room temperature under gently agitation.

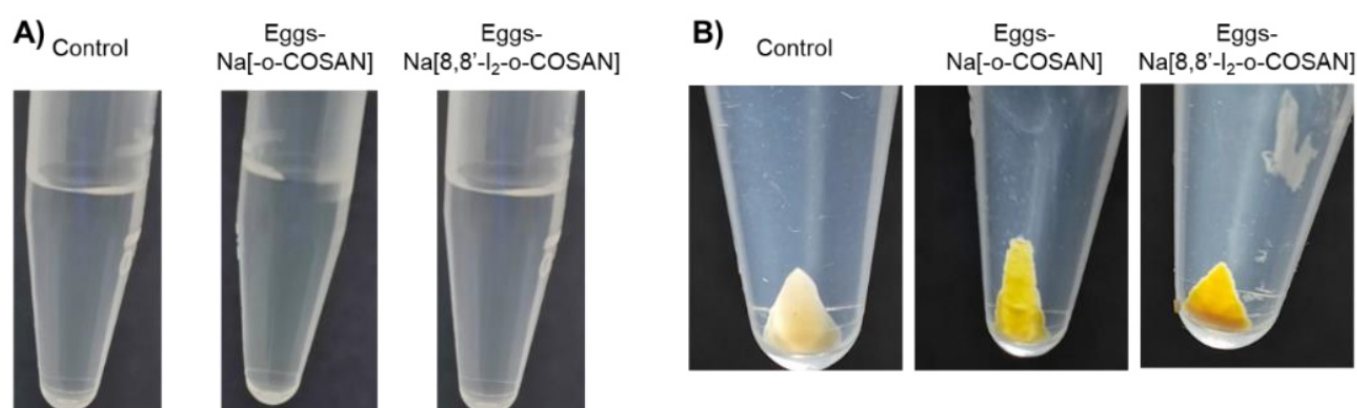

**Figure S11.** Cobaltabis(dicarbollide) extraction with D<sub>2</sub>O. a) Photography of the D<sub>2</sub>O filtrated supernatant solutions of the control and treated cobaltabis(dicarbollide) samples. b) Photography of the dried pellets of the control and treated cobaltabis(dicarbollide) samples after extraction with D<sub>2</sub>O.

a)

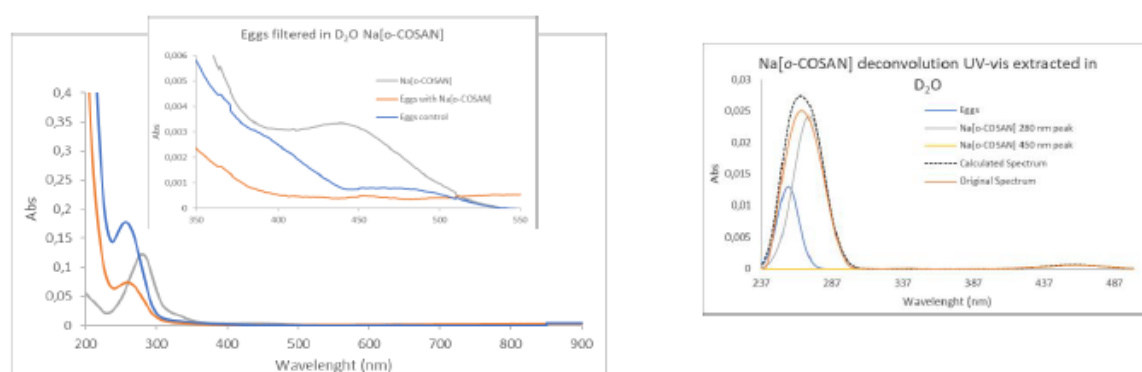

b)

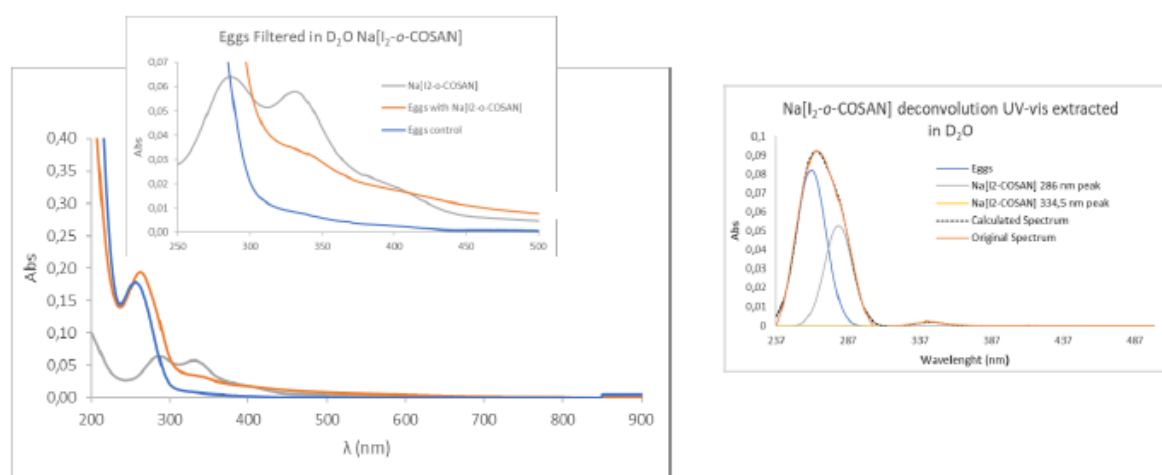

**Figure S12.** UV-vis spectra of D<sub>2</sub>O filtrated supernatant solutions. (a) After treatment with Na[o-COSAN]; inset a magnification of the spectrum and its deconvolution (right). (b) After treatment with Na[I<sub>2</sub>-o-COSAN]; inset a magnification of the spectrum and its deconvolution (right).

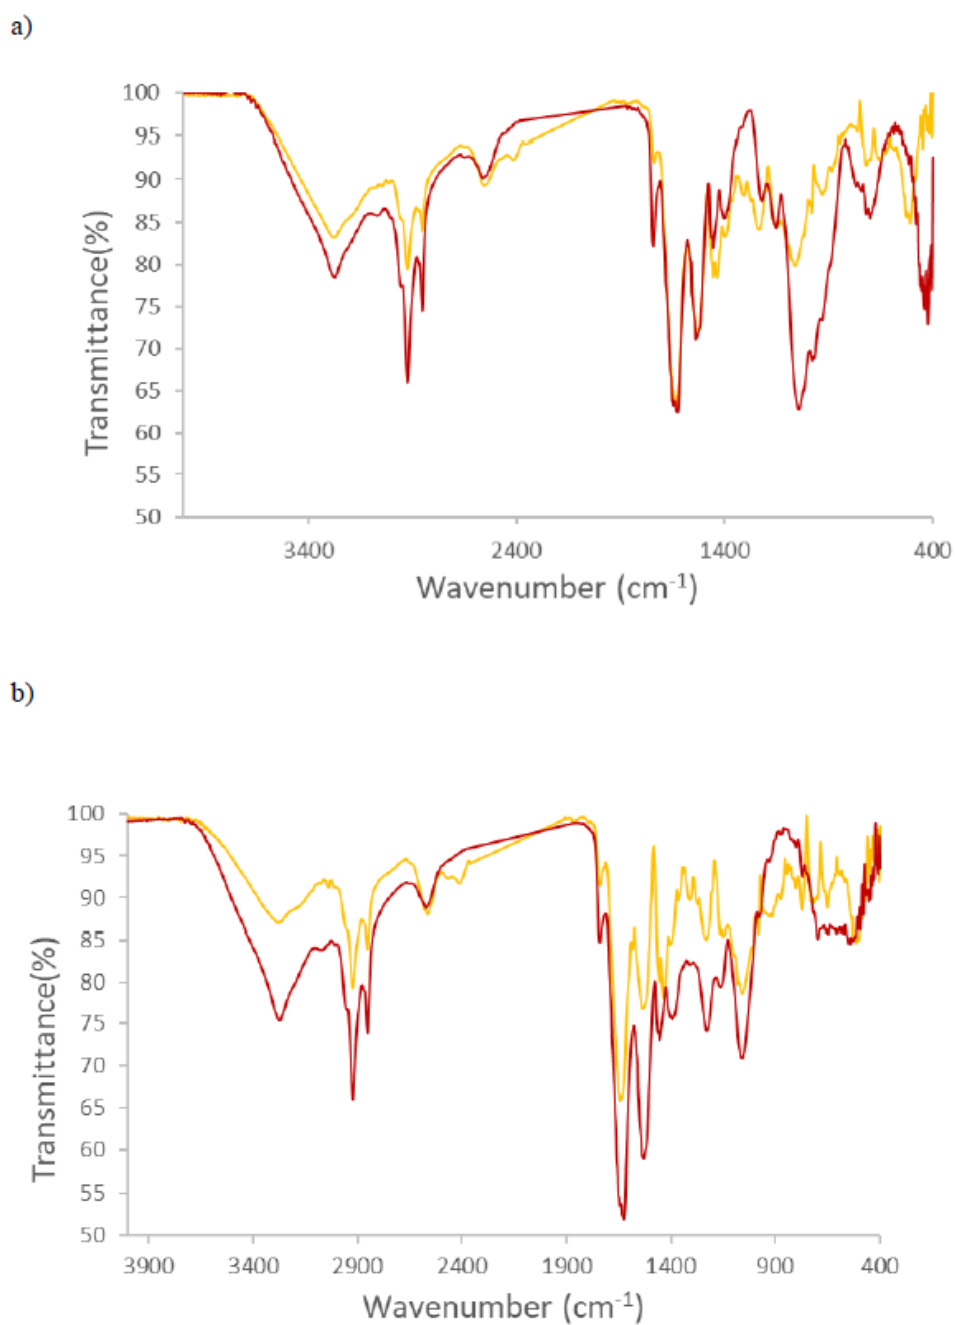

**Figure S13.** UV-vis spectra of D2O filtrated supernatant solutions. (a) After treatment with Na[o-COSAN]; inset a magnification of the spectrum and its deconvolution (right). (b) After treatment with Na[8,8-I2-o-COSAN]; inset a magnification of the spectrum and its deconvolution (right).

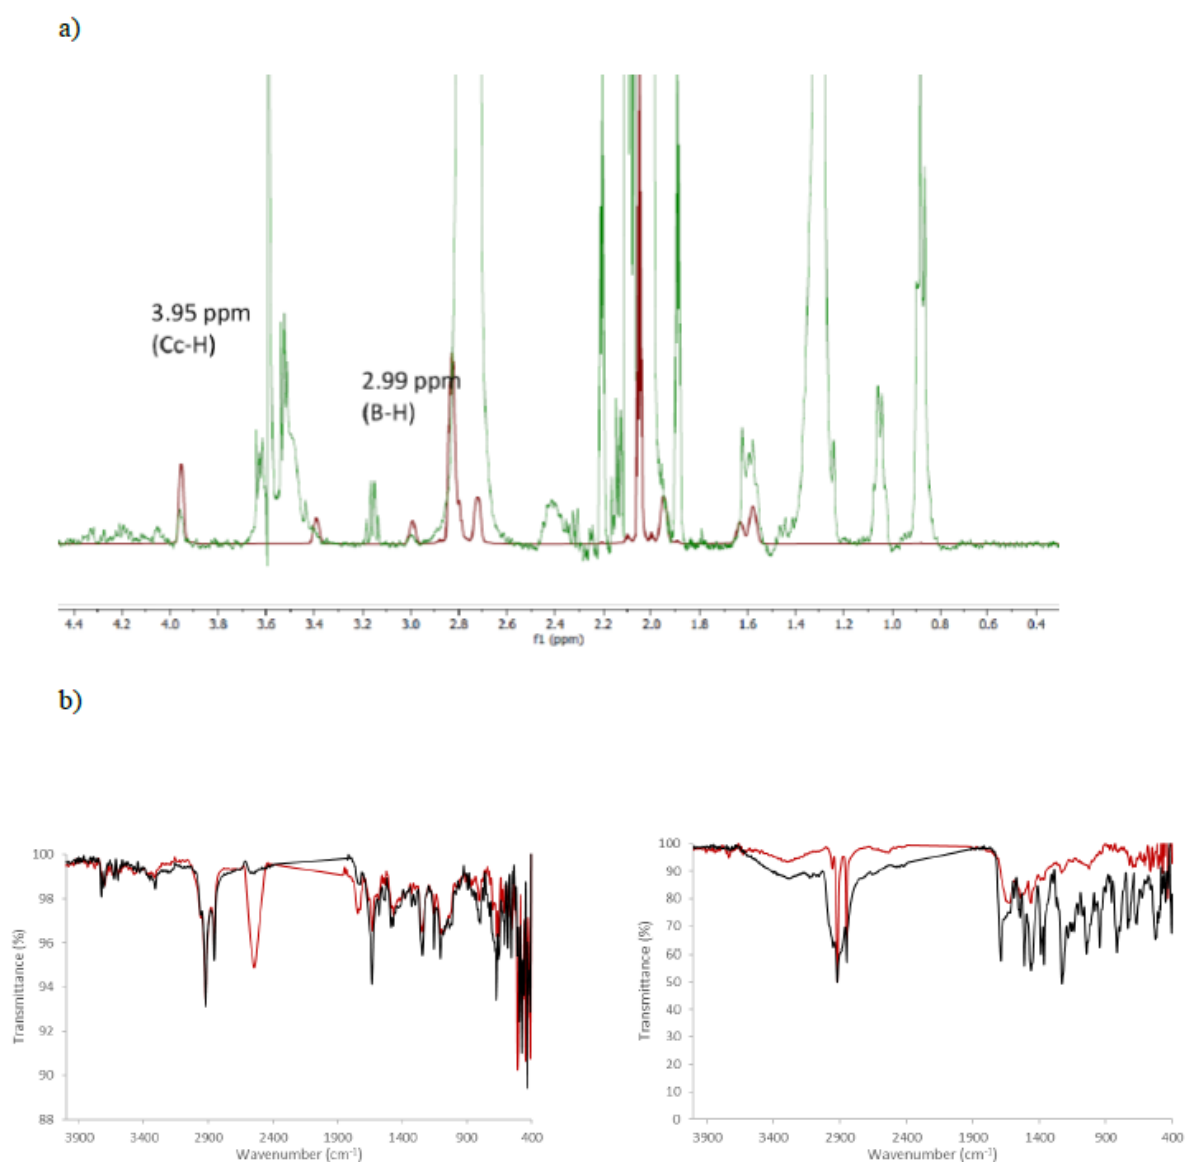

**Figure S14.** (a)  $^1\text{H}\{^{11}\text{B}\}$  NMR spectrum of d<sub>6</sub>-acetone filtrated supernatant solution after treatment with Na[o-COSAN] in the range 4.5–0.4 ppm; *C. elegans* eggs with Na[o-COSAN] (green), Na[o-COSAN] (red). (b) Left, ATR-IR spectra of the dried d<sub>6</sub>-acetone filtrated supernatant solution after treatment with Na[o-COSAN] (red) and *C. elegans* eggs control (black); right, the residual pellet *C. elegans* eggs (red) and *C. elegans* eggs control (black).

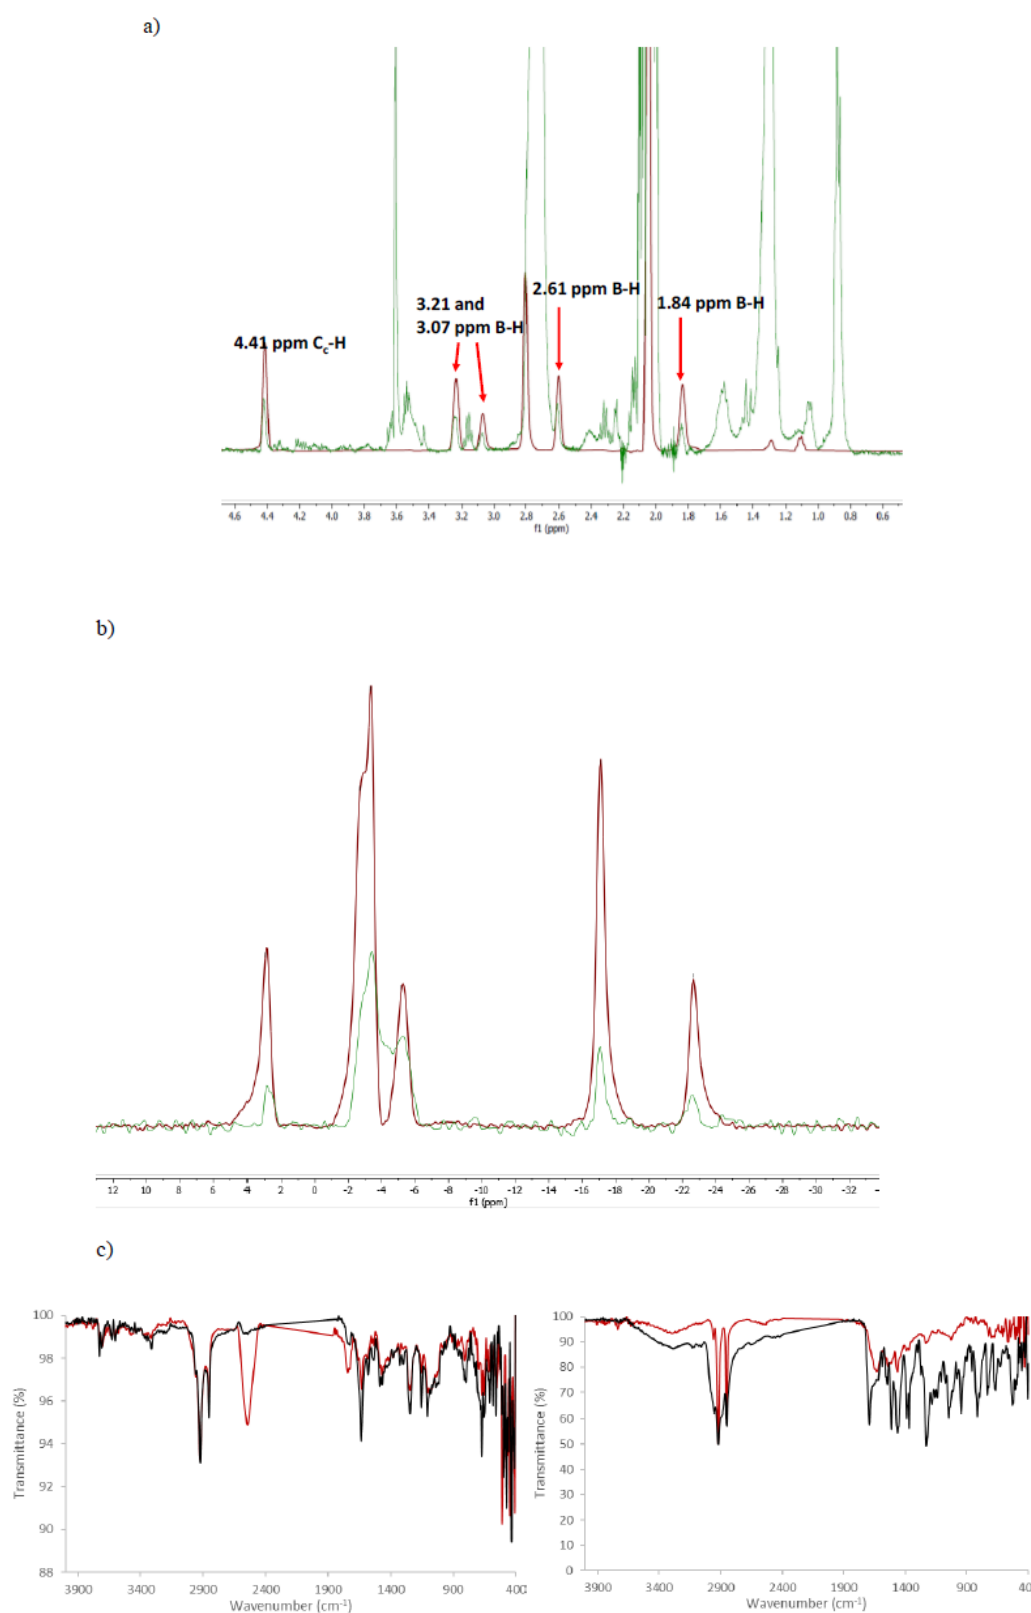

**Figure S15.** (a)  ${}^1\text{H}\{^{11}\text{B}\}$  NMR spectrum of d6-acetone filtrated supernatant solution after treatment with Na[I2-*o*-COSAN] in the range 5-2 ppm; *C. elegans* eggs with Na[8,8'-I2-*o*-COSAN] (green), Na[8,8'-I2-*o*-COSAN] (red). (b)  $^{11}\text{B}\{^1\text{H}\}$  NMR spectrum of a) d6-acetone filtrated supernatant solution after treatment with Na[8,8'-I2-*o*-COSAN] (red) and Na[8,8'-I2-*o*-COSAN] (green). (c) Left, ATR-IR spectra of the dried d6-acetone filtrated supernatant solution after treatment with Na[8,8'-I2-*o*-COSAN] (red) and *C. elegans* eggs control (black); right, the residual pellet *C. elegans* eggs (red) and *C. elegans* eggs control (black).
